# Supplementary material for: Highly conductive biocarbon nanostructures from burlap waste as sustainable additives for supercapacitor electrodes
Source: Royal Society of Chemistry journal article supplement (doi:10.1039/d3ma00491k), 2023-12-06
Supplement: d3ma00491k1.pdf [file d3ma00491k1.pdf]

## Highly conductive biocarbon nanostructures from burlap waste as a sustainable additive for supercapacitor electrodes

Haftom Weldekidan <sup>a,b</sup>, Singaravelu Vivekanandhan<sup>c</sup>, Neelima Tripathi <sup>a,b</sup>,  
Amar Mohanty <sup>a,b\*</sup>, Manjusri Misra <sup>a,b</sup>

<sup>a</sup> Bioproducts Discovery and Development Centre, Department of Plant Agriculture, Crop Science Building, University of Guelph, Guelph, N1G 2W1 Ontario, Canada

<sup>b</sup> School of Engineering, University of Guelph, Guelph, N1G 2W1 Ontario, Canada

<sup>c</sup> Sustainable Materials and Nanotechnology Lab, Department of Physics, V. H. N. S. N. College (Autonomous), Virudhunagar, Tamil Nadu 626 001, India

**\*Corresponding author:** [mohanty@uoguelph.ca](mailto:mohanty@uoguelph.ca) (Amar Mohanty)

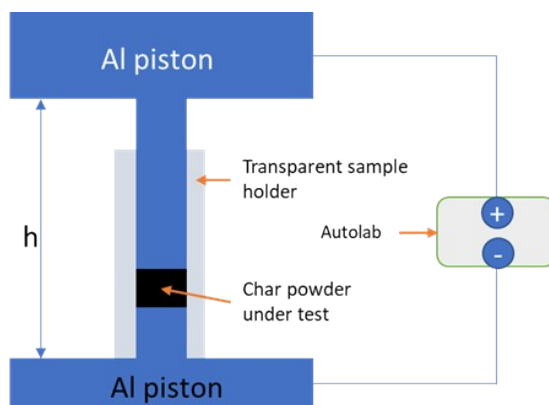

Supplementary Fig. 1. Schematic illustrations of the experimental device for measuring electrical resistance of the powders.

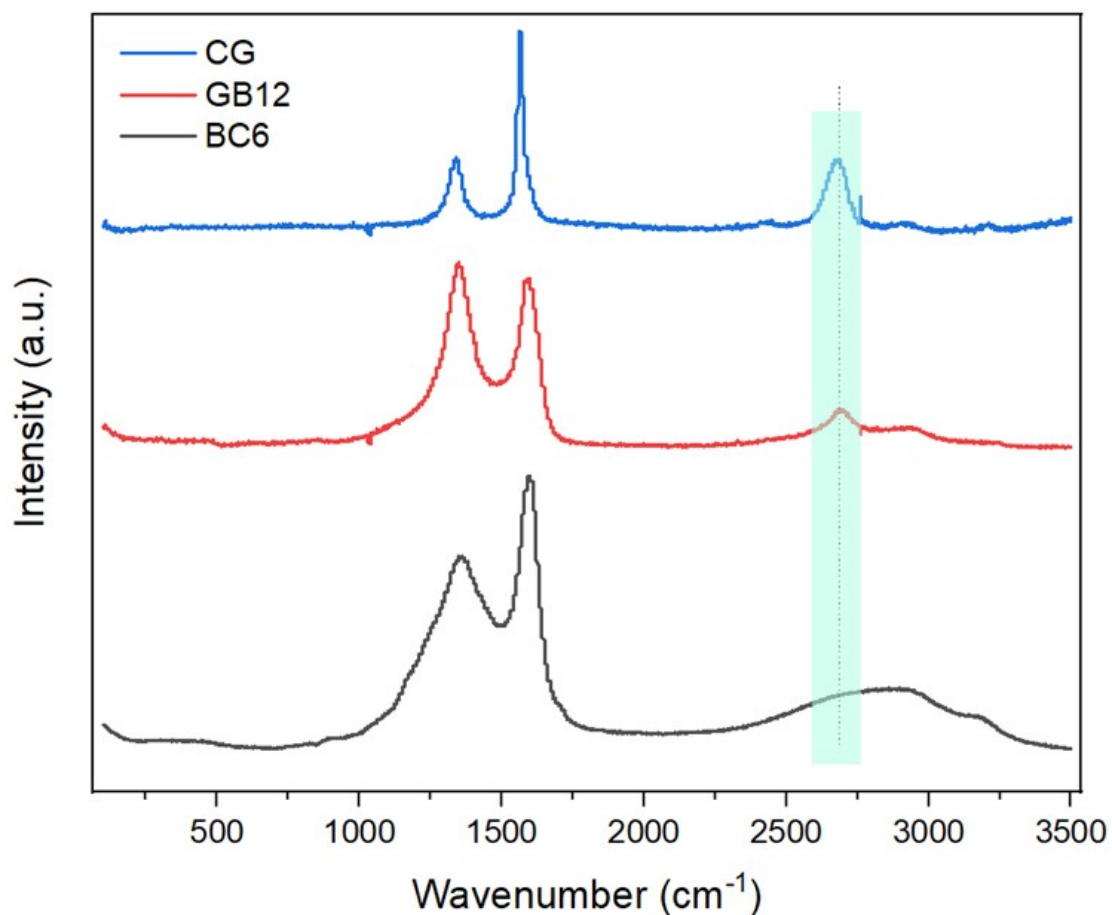

Supplementary Fig. 2. Full Raman spectra. Burlap carbon produced at 600°C (BC6), burlap carbon produced at 1200°C with iron nitrate catalyst (GB12) and the commercial grade graphene (CG). The peak around 2700  $\text{cm}^{-1}$  for CG and GB12 is associated with the few numbers of graphene sheets in the samples.

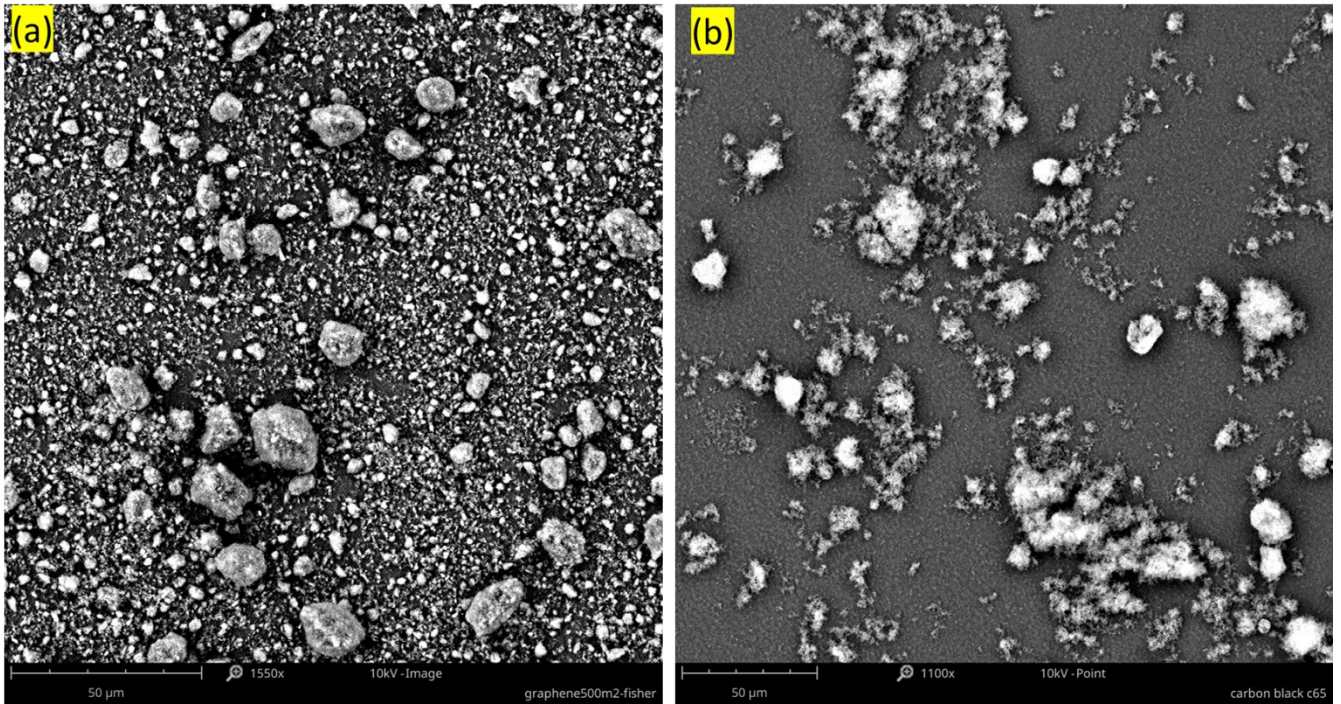

Supplementary Fig. 3. SEM images of the commercial grade graphene (CG) (a) and carbon black (SP) (b). The particles in the commercial grade graphene form aggregate agglomerates and increased the contact resistance, resulting in reduced conductivity. The carbon black used in this work is amorphous carbon and has fluffy structure which also can form spherical agglomerates leading to lower conductivity values.

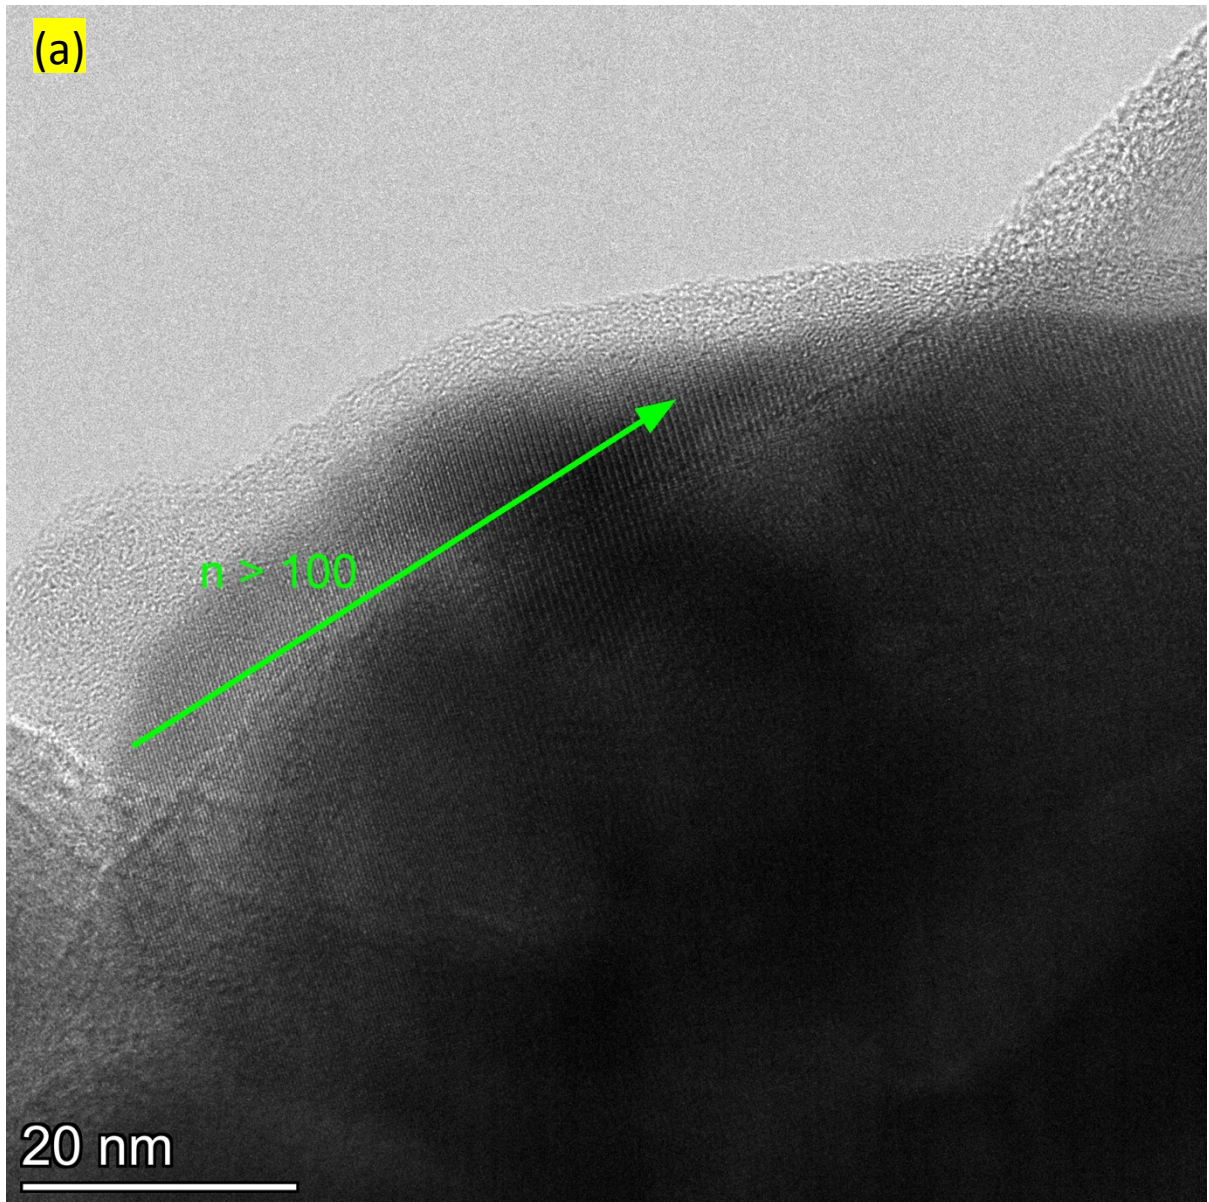

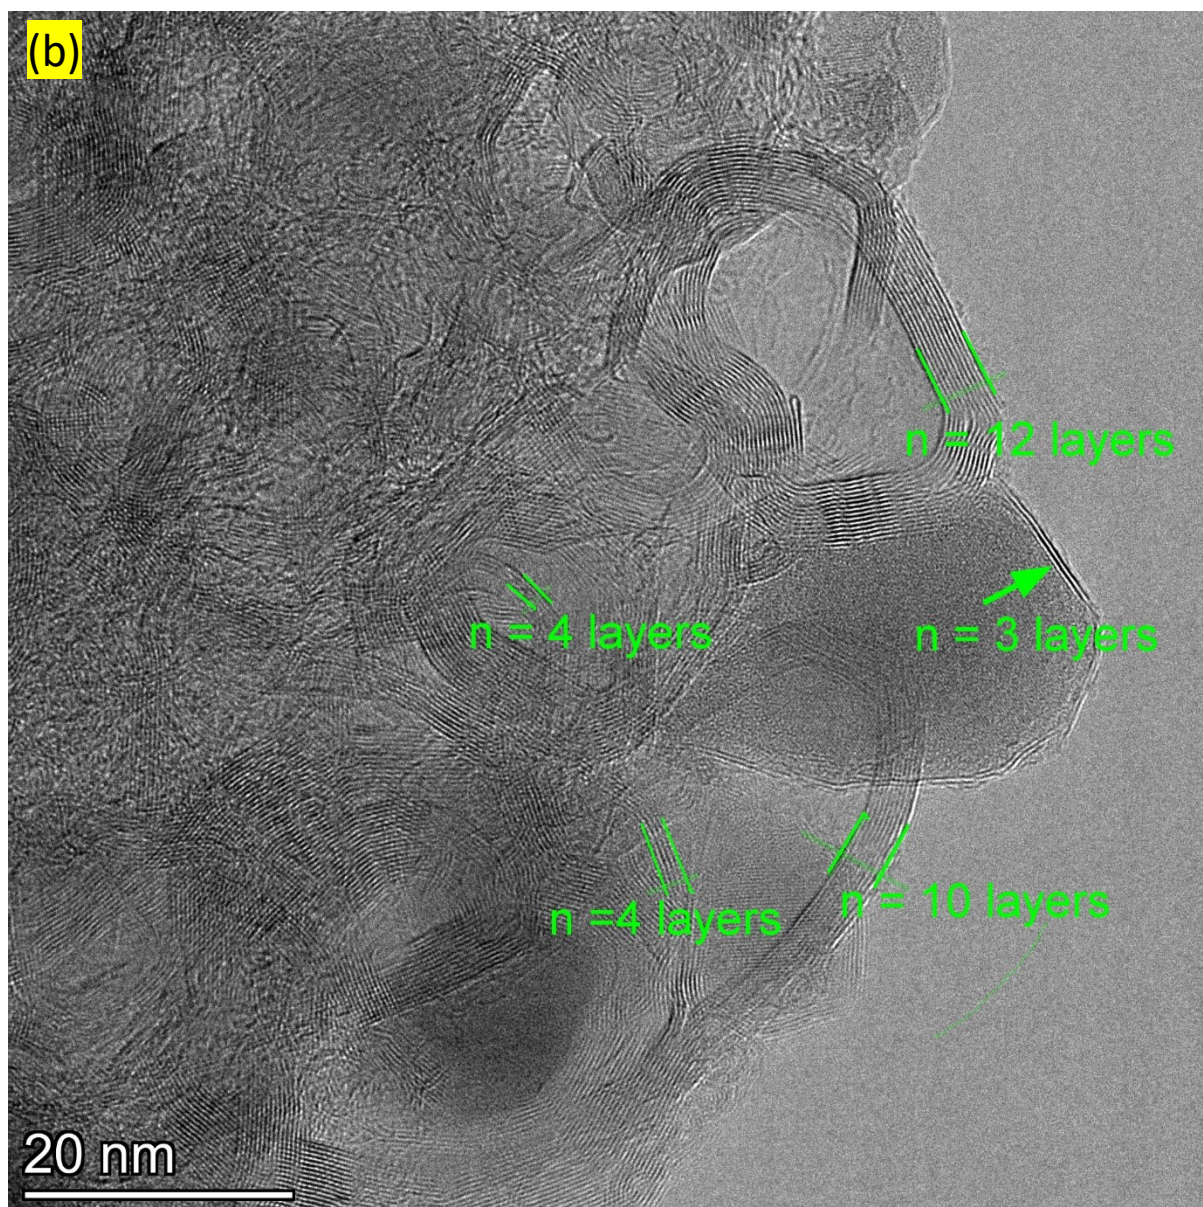

Supplementary Fig. 4. HRTEM images. Burlap-based biocarbon produced at 600°C (a), and burlap-based graphitic biocarbon produced with iron nitrate catalyst at 1200°C, showing few layers (3-12) of graphene sheets (b)
